# Supplementary material
Source: PubMed Central journal article supplement (PMC7065951)
Supplement: NIHMS1055992-supplement-Supplemental_Table.pdf [file NIHMS1055992-supplement-Supplemental_Table.pdf]

**Supplemental Table. Multivariable logistic regression of prevalent UU mono-infection controlling for case vs control status**

| <b>Variable</b>                        | <b>Effect</b>                           | <b>Odds Ratio</b>    | <b>P-value</b> |
|----------------------------------------|-----------------------------------------|----------------------|----------------|
| <b>Age</b>                             | Continuous                              | 0.966 (0.935, 0.998) | 0.039          |
| <b>Clinical group</b>                  | Case vs. Control                        | 1.167 (0.582, 2.337) | 0.6635         |
| <b>Years Sexually Active</b>           | Continuous                              | 0.972 (0.940, 1.005) | 0.0934         |
| <b>Clinical group</b>                  | Case vs. Control                        | 1.356 (0.669, 2.747) | 0.3977         |
| <b>Race</b>                            | Black or African American vs White      | 0.771(0.306,1.943)   | 0.3062         |
|                                        | Other vs White                          | 1.811(0.567,5.785)   |                |
| <b>Clinical group</b>                  | Case vs. Control                        | 0.507(0.218,1.178)   | 0.1143         |
| <b>Education</b>                       | High School or less vs College Graduate | 1.386(0.408,4.709)   | 0.4748         |
|                                        | Some College vs. College Graduate       | 1.996(0.598,6.662)   |                |
| <b>Clinical group</b>                  | Case vs. Control                        | 0.509(0.226,1.142)   | 0.1014         |
| <b>Sexual Orientation</b>              | Man vs Woman                            | 1.335(0.508,3.508)   | 0.1341         |
| <b>Clinical group</b>                  | Case vs. Control                        | 0.537(0.239,1.211)   | 0.5014         |
| <b>Prior Dx Chlamydia</b>              | No Vs Yes                               | 1.331(0.579,3.061)   | 0.5014         |
| <b>Clinical group</b>                  | Case vs. Control                        | 0.547(0.242,1.235)   | 0.1464         |
| <b>Prior Dx Gonorrhoea</b>             | No Vs Yes                               | 0.942(0.399,2.227)   | 0.0929         |
| <b>Clinical group</b>                  | Case vs. Control                        | 0.505(0.227,1.121)   | 0.9656         |
| <b>Prior Dx Syphilis</b>               | No Vs Yes                               | 1.289(0.153,10.838)  | 0.8152         |
| <b>Clinical group</b>                  | Case vs. Control                        | 0.508(0.231,1.118)   | 0.0924         |
| <b>Prior Dx NGU</b>                    | No Vs Yes                               | 6.329(1.406,28.49)   | 0.0162         |
| <b>Clinical group</b>                  | Case vs. Control                        | 0.769(0.338,1.748)   | 0.5302         |
| <b>Genital Warts</b>                   | No Vs Yes                               | 0.48(0.144,1.607)    | 0.2339         |
| <b>Clinical group</b>                  | Case vs. Control                        | 0.471(0.21,1.057)    | 0.0678         |
| <b>Gave Oral Sex, Past Year</b>        | No Vs Yes                               | 1.147(0.306,4.293)   | 0.8389         |
| <b>Clinical group</b>                  | Case vs. Control                        | 0.548(0.235,1.279)   | 0.1644         |
| <b>Gave Oral Sex, Past 60 Days</b>     | No Vs Yes                               | 0.626(0.218,1.799)   | 0.3844         |
| <b>Clinical group</b>                  | Case vs. Control                        | 0.613(0.262,1.437)   | 0.2603         |
| <b>Received Oral Sex, Past Year</b>    | No Vs Yes                               | 2.145(0.642,7.171)   | 0.2152         |
| <b>Clinical group</b>                  | Case vs. Control                        | 0.551(0.239,1.266)   | 0.1601         |
| <b>Received Oral Sex, Past 60 Days</b> | No Vs Yes                               | 1.399(0.478,4.095)   | 0.5404         |
| <b>Clinical group</b>                  | Case vs. Control                        | 0.538(0.233,1.246)   | 0.148          |
| <b>Vaginal Sex, Past Year</b>          | No Vs Yes                               | 1.365(0.521,3.576)   | 0.5272         |
| <b>Clinical group</b>                  | Case vs. Control                        | 0.585(0.252,1.358)   | 0.212          |

|                                             |                  |                    |        |
|---------------------------------------------|------------------|--------------------|--------|
| <b>Vaginal Sex, Past 60 Days</b>            | No Vs Yes        | 1.206(0.483,3.009) | 0.6886 |
| <b>Clinical group</b>                       | Case vs. Control | 0.572(0.247,1.323) | 0.1919 |
| <b>Gave Anal Sex, Past Year</b>             | No Vs Yes        | 0.755(0.325,1.759) | 0.5153 |
| <b>Clinical group</b>                       | Case vs. Control | 0.585(0.252,1.356) | 0.2111 |
| <b>Gave Anal Sex, Past 60 Days</b>          | No Vs Yes        | 0.697(0.285,1.701) | 0.4277 |
| <b>Clinical group</b>                       | Case vs. Control | 0.589(0.254,1.365) | 0.217  |
| <b>Gave Oral Anal Sex, Past Year</b>        | No Vs Yes        | 0.525(0.219,1.256) | 0.1476 |
| <b>Clinical group</b>                       | Case vs. Control | 0.639(0.272,1.503) | 0.305  |
| <b>Gave Oral Anal Sex, Past 60 Days</b>     | No Vs Yes        | 0.518(0.202,1.33)  | 0.1718 |
| <b>Clinical group</b>                       | Case vs. Control | 0.621(0.266,1.451) | 0.2711 |
| <b>Received Oral Anal Sex, Past Year</b>    | No Vs Yes        | 0.934(0.356,2.452) | 0.89   |
| <b>Clinical group</b>                       | Case vs. Control | 0.566(0.242,1.324) | 0.1891 |
| <b>Received Oral Anal Sex, Past 60 Days</b> | No Vs Yes        | 0.631(0.22,1.813)  | 0.3927 |
| <b>Clinical group</b>                       | Case vs. Control | 0.616(0.259,1.464) | 0.2725 |
| <b>Received Anal Sex, Past Year</b>         | No Vs Yes        | 0.821(0.275,2.45)  | 0.7236 |
| <b>Clinical group</b>                       | Case vs. Control | 0.576(0.247,1.346) | 0.2028 |
| <b>Received Anal Sex, Past 60 Days</b>      | No Vs Yes        | 0.85(0.257,2.812)  | 0.7902 |
| <b>Clinical group</b>                       | Case vs. Control | 0.572(0.245,1.337) | 0.197  |
| <b>Age first had sex</b>                    |                  | 1.034(0.895,1.194) | 0.65   |
| <b>Clinical group</b>                       | Case vs. Control | 0.521(0.221,1.23)  | 0.1368 |
| <b>Number of sex partners, Lifetime</b>     |                  | 1.011(1.003,1.018) | 0.0059 |
| <b>Clinical group</b>                       | Case vs. Control | 0.649(0.211,1.999) | 0.4512 |
| <b>Number of sex partners, Past Year</b>    |                  | 1.026(0.995,1.059) | 0.0982 |
| <b>Clinical group</b>                       | Case vs. Control | 0.569(0.239,1.353) | 0.2017 |
| <b>Number of sex partners, Past 60 days</b> |                  | 1.097(0.923,1.303) | 0.2934 |
| <b>Clinical group</b>                       | Case vs. Control | 0.526(0.227,1.219) | 0.1342 |
